# Supplementary material for: All-dry, one-step synthesis, doping and film formation of conductive polypyrrole
Source: Royal Society of Chemistry journal article supplement (doi:10.1039/d1tc05082f), 2021-12-06
Supplement: d1tc05082f1.pdf [file d1tc05082f1.pdf]

## Supplementary Information

### All-Dry, One-step Synthesis, Doping and Film Formation of Conductive Polypyrrole

Afshin Dianatdar <sup>1</sup>, Matteo Miola <sup>1</sup>, Oreste De Luca <sup>2</sup>, Petra Rudolf <sup>2</sup>, Francesco Picchioni <sup>1</sup>, Ranjita K. Bose <sup>1\*</sup>

<sup>1</sup> Department of Chemical Engineering, Engineering and Technology Institute Groningen (ENTEG), University of Groningen, 9747AG Groningen, The Netherlands.

<sup>2</sup> Zernike Institute for Advanced Materials, University of Groningen, 9747 AG Groningen, The Netherlands

---

\* Corresponding author. Tel.: +31 50 3634486  
Email address: r.k.bose@rug.nl

Table S1. Detailed experimental condition of PPy synthesis using oCVD outlining deposition temperature (Ts), reactor net pressure during deposition (Pr), oxidant and monomer flow rates in sccm and also mol min<sup>-1</sup>, saturation pressure of the oxidant and monomer, partial pressures, diluent (N<sub>2</sub>) flow rates, and surface availability of oxidant to monomer in mol/mol and based on pressure C<sub>ox</sub>/C<sub>mo</sub>\*:

$$* C_{ox}/C_{mo} = \frac{\left(\frac{P}{P_{sat}}\right)_{SbCl_5}}{\left(\frac{P}{P_{sat}}\right)_{Pyrrole}}$$

|            |                           | SbCl <sub>5</sub>   |                        |              |                             |                    | Pyrrole             |                        |              |                  |                    |                                    |                                            |                                  |
|------------|---------------------------|---------------------|------------------------|--------------|-----------------------------|--------------------|---------------------|------------------------|--------------|------------------|--------------------|------------------------------------|--------------------------------------------|----------------------------------|
| Ts<br>(°C) | P <sub>r</sub><br>(mTorr) | Flow rate<br>(sccm) | Flow rate<br>(mol/min) | P<br>(mTorr) | P <sup>sat</sup><br>(mTorr) | P/P <sup>sat</sup> | Flow rate<br>(sccm) | Flow rate<br>(mol/min) | P<br>(mTorr) | P sat<br>(mTorr) | P/P <sup>sat</sup> | N <sub>2</sub> flow<br>rate (sccm) | SbCl <sub>5</sub><br>/Pyrrole<br>(mol/mol) | C <sub>ox</sub> /C <sub>mo</sub> |
| 20         | 1000                      | 1.25                | 0.009                  | 250          | 2285                        | 0.109              | 2.5                 | 0.036                  | 500          | 4184             | 0.119              | 1.25                               | 0.272                                      | 0.91                             |
| 40         | 1000                      | 1.25                | 0.009                  | 250          | 5299                        | 0.047              | 2.5                 | 0.036                  | 500          | 14218            | 0.03               | 1.25                               | 0.272                                      | 1.34                             |
| 60         | 1000                      | 1.25                | 0.009                  | 250          | 11106                       | 0.022              | 2.5                 | 0.036                  | 500          | 41717            | 0.011              | 1.25                               | 0.272                                      | 1.87                             |
| 80         | 1000                      | 1.25                | 0.009                  | 250          | 21405                       | 0.011              | 2.5                 | 0.036                  | 500          | 108350           | 0.004              | 1.25                               | 0.272                                      | 2.53                             |
| 40         | 200                       | 1.25                | 0.009                  | 50           | 5299                        | 0.009              | 2.5                 | 0.036                  | 100          | 14218            | 0.007              | 1.25                               | 0.272                                      | 1.34                             |
| 40         | 300                       | 1.25                | 0.009                  | 75           | 5299                        | 0.014              | 2.5                 | 0.036                  | 150          | 14218            | 0.010              | 1.25                               | 0.272                                      | 1.34                             |
| 40         | 500                       | 1.25                | 0.009                  | 125          | 5299                        | 0.023              | 2.5                 | 0.036                  | 250          | 14218            | 0.017              | 1.25                               | 0.272                                      | 1.34                             |
| 40         | 1000                      | 1.25                | 0.009                  | 250          | 5299                        | 0.047              | 2.5                 | 0.036                  | 500          | 14218            | 0.035              | 1.25                               | 0.272                                      | 1.34                             |
| 40         | 300                       | 0.25                | 0.001                  | 15           | 5299                        | 0.002              | 2.5                 | 0.036                  | 150          | 14218            | 0.010              | 2.25                               | 0.054                                      | 0.26                             |
| 40         | 300                       | 0.5                 | 0.003                  | 30           | 5299                        | 0.005              | 2.5                 | 0.036                  | 150          | 14218            | 0.010              | 2                                  | 0.109                                      | 0.53                             |
| 40         | 300                       | 1.25                | 0.009                  | 75           | 5299                        | 0.014              | 2.5                 | 0.036                  | 150          | 14218            | 0.010              | 1.25                               | 0.272                                      | 1.34                             |
| 40         | 300                       | 1.25                | 0.009                  | 75           | 5299                        | 0.014              | 1.25                | 0.018                  | 75           | 14218            | 0.005              | 2.5                                | 0.545                                      | 2.68                             |

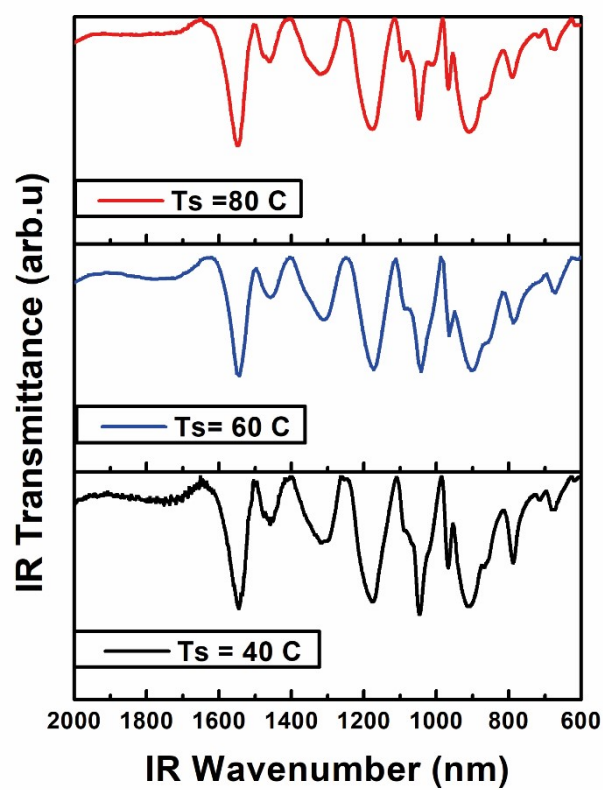

Figure S1. FTIR spectra of PPy thin films deposited at different temperatures

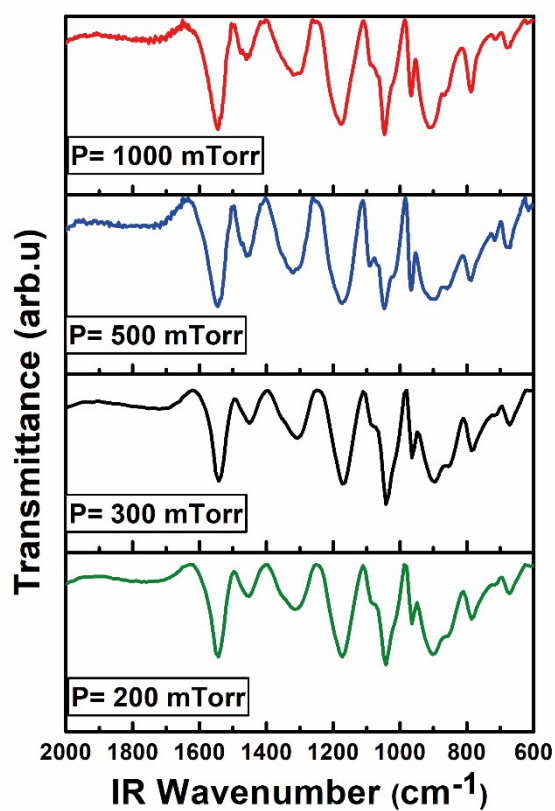

Figure S2. FTIR spectra of PPy thin films deposited at different pressures

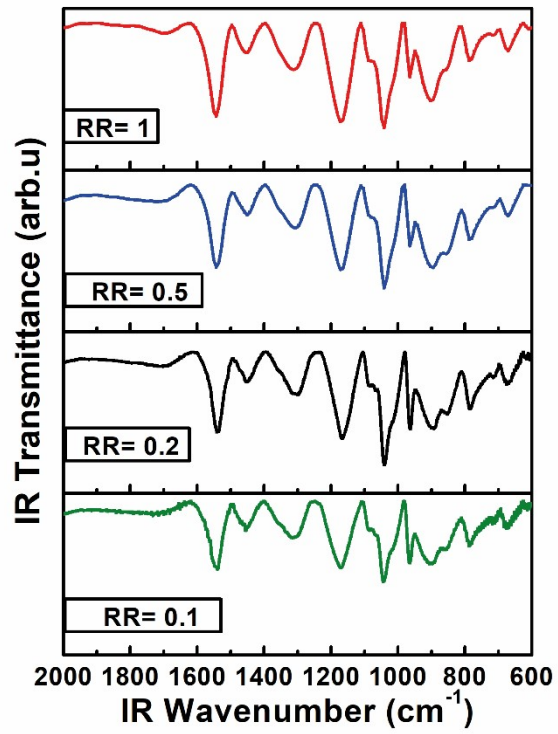

Figure S3. FTIR spectra of PPy thin films deposited at different oxidant to monomer (RR) ratios

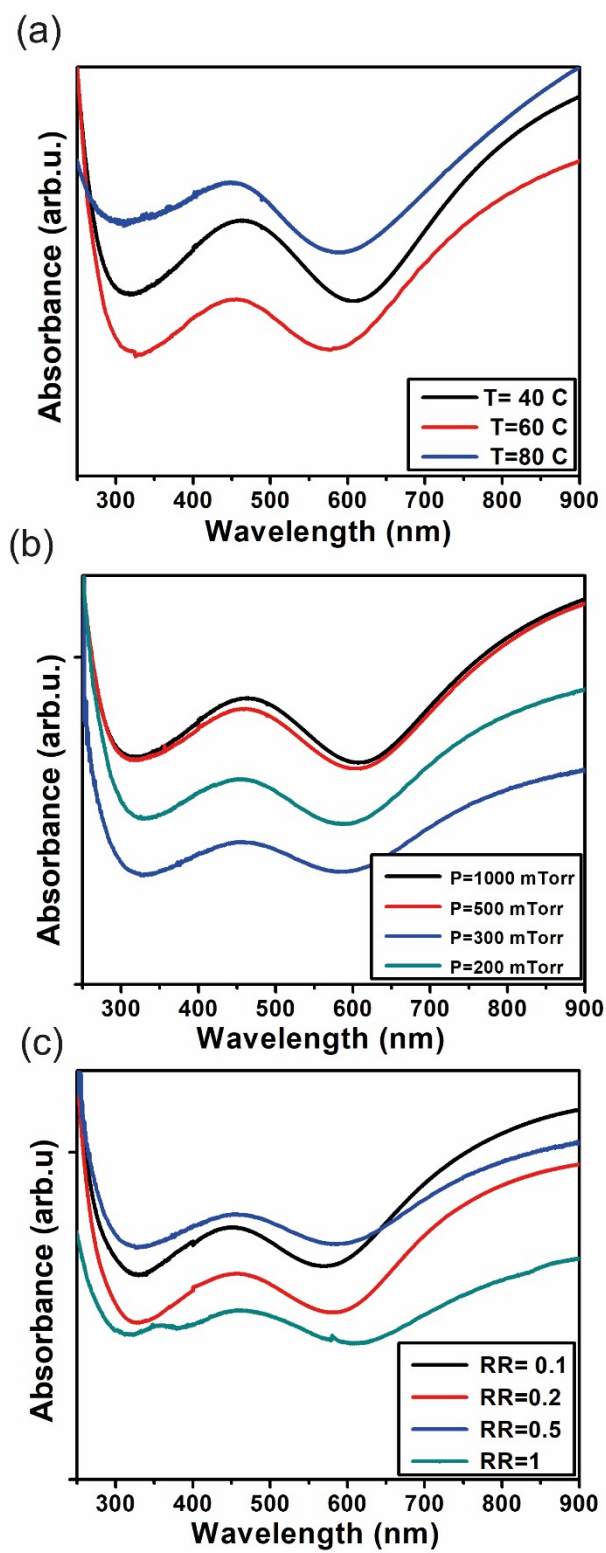

Figure S4. UV-vis spectra of PPy thin films deposited at (a) different temperatures, (b) different pressures and (c) different oxidant to monomer (RR) ratios

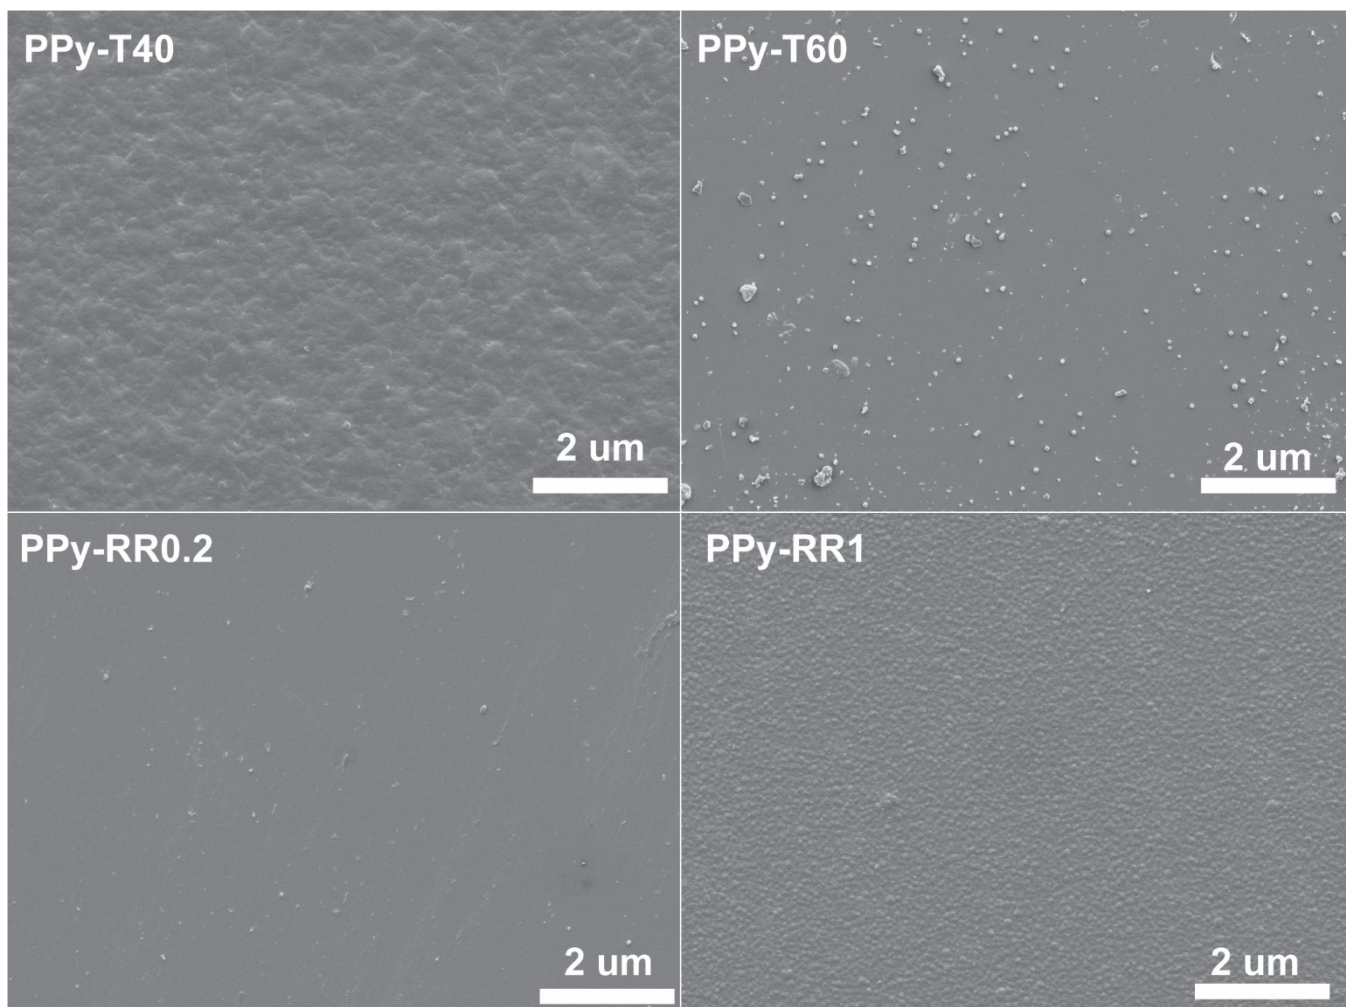

Figure S5. Comparison of the surface morphology of PPy films deposited at different temperature or with oxidant to monomer ratio: SEM micrographs of PPy-T40 and PPy-T60 (top); PPy-RR0.2 and PPy-RR1 (bottom).

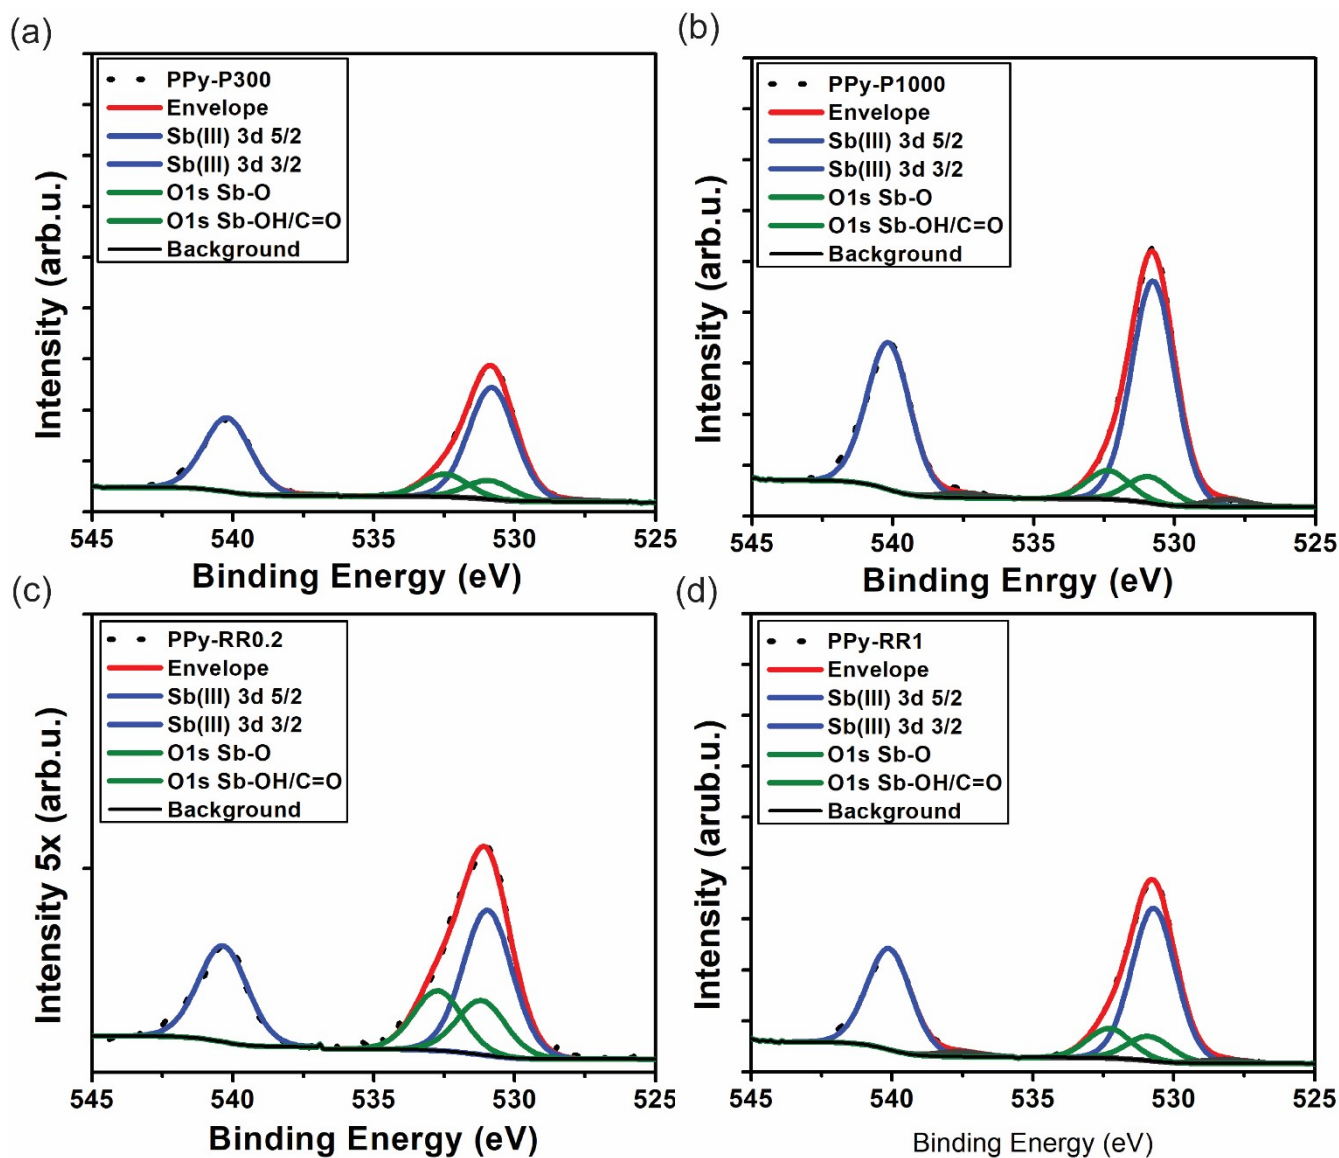

Figure S6. XPS spectra of the Sb 3d and O1s core level regions: (a) PPy-P300, (b) PPy-P1000 (=PPy-RR0.5), (c) PPy-RR0.2, and (d) PPy-RR1

Table S2. Chemical environments of antimony and oxygen as identified from the Sb 3d and O1s XPS spectra of PPy films synthesized at different pressure and with different oxidant to monomer ratio .

| Chemical Environment | Relative contribution to the total spectral intensity of the Sb3d or O1s core level line (%) |           |           |         | Binding Energy (eV) |
|----------------------|----------------------------------------------------------------------------------------------|-----------|-----------|---------|---------------------|
|                      | PPy-P300                                                                                     | PPy-P1000 | PPy-RR0.2 | PPy-RR1 |                     |
| Sb (III) 3d          | 47.4                                                                                         | 57.8      | 31.3      | 70.8    | 530.8               |
| Sb (0) 3d            | 1.0                                                                                          | 2.0       | 0         | 2.8     | 527.8               |
| O1s (Sb-O)           | 23.3                                                                                         | 19.1      | 33.7      | 6.6     | 531                 |
| O1s (C=O)            | 28.3                                                                                         | 21.1      | 35        | 19.8    | 532.5               |
